# Supplementary material for: Identification of Oncosuppressing Effects of Seven Selenoproteins in Thyroid Cancer: Implications for Distinct Roles of Selenoproteins in Tumorigenesis
Source: Research Square preprint supplement (doi:10.21203/rs.3.rs-402154/v1), 2021-04-13
Supplement: Supplementary file 1 [file e827b7ea19ad2cb65676c54a.docx]

**Supplementary Figure Legends**

**Supplementary Figure S1** Recurrence-free survival (RFS) curves generated from Kaplan-Meier plotter for mRNA expressions of the 25 selenoproteins in patients with thyroid cancer. HR = hazard ratio.
